# Supplementary material for: Applications of Fractional Lower Order Synchrosqueezing Transform Time Frequency Technology to Machine Fault Diagnosis
Source: Hindawi journal article supplement (doi:10.1155/2020/3983242), 2020-08-03
Supplement: f1 [file 3983242.f1.zip]

Archive with 9 entries (8 files):
- 3983242.f1/signals/
- 3983242.f1/signals/1.txt
- 3983242.f1/signals/209-inner.mat
- 3983242.f1/signals/222-ball.mat
- 3983242.f1/signals/ball.mat
- 3983242.f1/signals/inner race.mat
- 3983242.f1/signals/normal01.mat
- 3983242.f1/signals/normal02.mat
- 3983242.f1/signals/outer race.mat
