# Supplementary material for: Applications of Fractional Lower Order Synchrosqueezing Transform Time Frequency Technology to Machine Fault Diagnosis
Source: Hindawi journal article supplement (doi:10.1155/2020/3983242), 2020-08-03
Supplement: f1 [file 3983242.f1.zip › 3983242.f1/signals/1.txt]

1¡¢DE,FE,BA·Ö±ð±íÊ¾Èý¸ö²»Í¬µÄ´«¸ÐÆ÷

DE - drive end accelerometer data
FE - fan end accelerometer data
BA - base accelerometer data
